# Supplementary material
Source: PubMed Central journal article supplement (PMC6049660)
Supplement: NIHMS975369-supplement.pdf [file NIHMS975369-supplement.pdf]

## **SUPPLEMENTAL MATERIAL**

### **Content of online supplement belonging to the manuscript**

- 1. Note S1** Proportion of FXa bleeding likely to need acute reversal
- 2. Table S1** Medical centers included in the study
- 3. Table S2** Patient demographics by bleeding type
- 4. Table S3** Bleeding and anticoagulant treatment timelines by bleeding type
- 5. Table S4** Length of stay of the study population and by bleeding location

### **Note S1: Proportion of FXa bleeding likely to need acute reversal**

The total FXa inhibitor major bleeding population is 80,000 per year in the U.S.<sup>7</sup> This includes approximately 12%-16% percent intracranial bleeding (ICH) based on the Kcentra and ARISTOTLE studies.<sup>17,23</sup> The higher acuity subset of bleeding patients enrolled in RE-VERSE AD,<sup>17</sup> ANNEXA-4<sup>11</sup> and our cohort contained 34%-42% ICH. Assuming all ICHs remain in the higher acuity subset, this allows us to establish a proportional relationship between the larger group and the subset, which then allows us to calculate the size of the subset. At the low end, 12% divided by 34%, gives us 0.35 which multiplied by 80,000 is 28,000. At the high end, 16% divided by 42% is 0.38 multiplied by 80,000 is 30,400. Crossing the low and high ends (12/42 and 16/34) gives us 0.29 and 0.47 for a maximum estimated range of higher acuity major bleeding of 23,200 to 37,600.

**Table S1. Medical centers included in the retrospective study**

| Medical Center                               | Investigator(s)                       | Type of Center | Patients  |
|----------------------------------------------|---------------------------------------|----------------|-----------|
| Seton Dell Medical School Stroke Institute   | Truman J. Milling, MD                 | Level 1 Trauma | 11        |
| Beaumont Hospital-Royal Oak                  | Carol L. Clark, MD                    | Level 1 Trauma | 13        |
| Allegheny General Hospital                   | Charles Feronti, DO                   | Level 1 Trauma | 12        |
| Cedars-Sinai Medical Center                  | Shlee S. Song, MD; Sam S. Torbati, MD | Level 1 Trauma | 14        |
| University of Cincinnati College of Medicine | Gregory J. Fermann, MD                | Level 1 Trauma | 6         |
| <b>Total</b>                                 |                                       |                | <b>56</b> |

**Table S2. Demographics and characteristics of the retrospective study population and by bleeding location**

| Characteristic                                              | Categories                | Total            | Gastrointestinal bleed | Intracranial hemorrhage | Other bleeding site |
|-------------------------------------------------------------|---------------------------|------------------|------------------------|-------------------------|---------------------|
| Patients – no. (%)                                          | All                       | 56 (100)         | 29 (52)                | 19 (34)                 | 8 (14)              |
| Age – years                                                 | Mean ± SD                 | 75.6 ± 11.5      | 76.0 ± 10.3            | 75.5 ± 14.5             | 74.4 ± 8.7          |
|                                                             | Median (IQR)              | 76.5 (70.3,84.2) | 76.6 (70.3,82.2)       | 77.5 (68.7,85.8)        | 74.5 (70.3,77.9)    |
| Gender – no. (%)                                            | Male                      | 33 (59)          | 16 (55)                | 12 (63)                 | 5 (63)              |
|                                                             | Female                    | 23 (41)          | 13 (45)                | 7 (37)                  | 3 (38)              |
| Ethnicity – no. (%)                                         | Caucasian                 | 43 (77)          | 24 (83)                | 13 (68)                 | 6 (75)              |
|                                                             | Others <sup>†</sup>       | 8 (14)           | 3 (10)                 | 5 (26)                  | 0 (0)               |
|                                                             | Unknown                   | 5 (9)            | 2 (7)                  | 1 (5)                   | 2 (25)              |
| Insurance type – no. (%)                                    | Public                    | 52 (93)          | 27 (93)                | 18 (95)                 | 7 (88)              |
|                                                             | Private                   | 4 (7)            | 2 (7)                  | 1 (5)                   | 1 (13)              |
| Charlson Comorbidity Index – score                          | Mean ± SD                 | 1.8 ± 1.5        | 2.2 ± 1.5 <sup>§</sup> | 1.0 ± 1.2 <sup>§</sup>  | 2.1 ± 1.2           |
|                                                             | Median (IQR)              | 2.0 (0.0,3.0)    | 2.0 (2.0,3.0)          | 0.0 (0.0,2.0)           | 2.0 (1.8,3.0)       |
| Anticoagulant – no. (%)                                     | Apixaban                  | 12 (21)          | 5 (17)                 | 6 (32)                  | 1 (13)              |
|                                                             | Rivaroxaban               | 38 (68)          | 23 (79)                | 11 (58)                 | 4 (50)              |
|                                                             | Enoxaparin                | 6 (11)           | 1 (3)                  | 2 (11)                  | 3 (38)              |
| Concomitant antiplatelets with DOACs <sup>‡</sup> – no. (%) | Concomitant antiplatelets | 22 (44)          | 12 (43)                | 6 (35)                  | 4 (80)              |
|                                                             | DOAC alone                | 28 (56)          | 16 (57)                | 11 (65)                 | 1 (20)              |

\* Percentages may not total 100 because of rounding

<sup>†</sup> Other ethnicities include Asian, black and Hispanic

‡ Includes rivaroxaban or apixaban

§ Statistical difference: p=0.005

|| SD: Standard deviation; IQR: Interquartile range; DOAC: Direct-acting oral anticoagulant

**Table S3. Bleeding and anticoagulant treatment timelines of the retrospective study population and by bleeding location**

| Characteristic                                         | Categories       | Total (n=56)      | Gastrointestinal bleed (n=29) | Intracranial hemorrhage (n=19) | Other bleeding site (n=8) |
|--------------------------------------------------------|------------------|-------------------|-------------------------------|--------------------------------|---------------------------|
| Cause of major bleed – no. (%)                         | Spontaneous      | 34 (61)           | 17 (59)                       | 10 (53)                        | 7 (88)                    |
|                                                        | Trauma           | 6 (11)            | 0 (0)                         | 6 (32)                         | 0 (0)                     |
|                                                        | Procedure        | 1 (2)             | 0 (0)                         | 0 (0)                          | 1 (13)                    |
|                                                        | Unknown          | 15 (27)           | 12 (41)                       | 3 (16)                         | 0 (0)                     |
| Time on anticoagulant – no. (%)                        | Known            | 32 (57)           | 18 (62)                       | 10 (53)                        | 4 (50)                    |
|                                                        | Unknown          | 24 (43)           | 11 (38)                       | 9 (47)                         | 4 (50)                    |
| Time on anticoagulant prior to bleeding event – days   | Median (IQR)     | 96.5 (19.8,209.8) | 82.5 (17.8,196.8)             | 108.0 (85.0,152.0)             | 378.0 (19.0,918.0)        |
| Time between bleeding event and admission – hr         | Median (IQR)     | 8.2 (0.7,26.7)    | 24.1 (8.5,63.8) <sup>‡</sup>  | 1.8 (0.0,8.8) <sup>‡</sup>     | 0.7 (-1.7,5.2)            |
| Blood loss ongoing at admission – no. (%)              | Yes              | 46 (82)           | 28 (97) <sup>§</sup>          | 13 (68) <sup>§</sup>           | 5 (63)                    |
|                                                        | No               | 10 (18)           | 1 (3)                         | 6 (32)                         | 3 (38)                    |
| Bleeding intensity at admission <sup>†</sup> – no. (%) | Major            | 14 (25)           | 9 (31)                        | 1 (5)                          | 4 (50)                    |
|                                                        | Life-threatening | 13 (23)           | 3 (10)                        | 10 (53)                        | 0 (0)                     |
|                                                        | Unknown          | 29 (52)           | 17 (59)                       | 8 (42)                         | 4 (50)                    |

\* Percentages may not total 100 because of rounding

† Based on American College of Surgeons Advanced Trauma Life Support (ATLS) classification of bleeding intensity

‡ Statistical difference: p=0.001; § Statistical difference: p=0.011

|| IQR: Interquartile range

**Table S4. Length of stay of the retrospective study population and by bleeding location**

| <b>Characteristic</b>         | <b>Categories</b> | <b>Total</b>  | <b>Gastrointestinal bleed</b> | <b>Intracranial hemorrhage</b> | <b>Other bleeding site</b> |
|-------------------------------|-------------------|---------------|-------------------------------|--------------------------------|----------------------------|
| Total LOS – days              | Mean ± SD         | 7.0 ± 7.4     | 5.9 ± 4.2                     | 8.1 ± 11.2                     | 8.4 ± 4.8                  |
|                               | Median (IQR)      | 5.0 (3.0,8.0) | 4.5 (3.0,6.0)                 | 4.0 (2.3,8.5)                  | 7.3 (5.8,9.3)              |
| ICU LOS – days                | Mean ± SD         | 5.9 ± 8.4     | 3.5 ± 2.5                     | 7.2 ± 11.2                     | 7.8 ± 6.4                  |
|                               | Median (IQR)      | 3.5 (1.5,6.8) | 2.0 (1.5,6.0)                 | 3.5 (1.0,7.0)                  | 5.0 (3.0,10.0)             |
| Telemetry/stepdown LOS – days | Mean ± SD         | 4.4 ± 1.9     | 4.5 ± 2.2                     | 3.5 ± 0.5                      | 4.7 ± 1.5                  |
|                               | Median (IQR)      | 4.0 (3.0,5.1) | 4.3 (3.3,5.4)                 | 3.5 (3.3,3.8)                  | 5.0 (4.0,5.5)              |

\* LOS: Length of stay; ICU: Intensive care unit; SD: Standard deviation; IQR: Interquartile range
